# Supplementary material
Source: PubMed Central journal article supplement (PMC5520423)
Supplement: IAI.00207-17_zii999092099s1.pdf [file IAI.00207-17_zii999092099s1.pdf]

## **Supplemental Information**

### **The atypical response regulator AtvR is a new player in *Pseudomonas aeruginosa* response to hypoxia and virulence**

Gilberto Hideo Kaihama, Leandro Carvalho Dantas Breda, José Roberto Fogaça de Almeida, Thays de Oliveira Pereira, Gianluca Gonçalves Nicastro, Ana Laura Boechat, Sandro Rogério de Almeida and Regina Lúcia Baldini

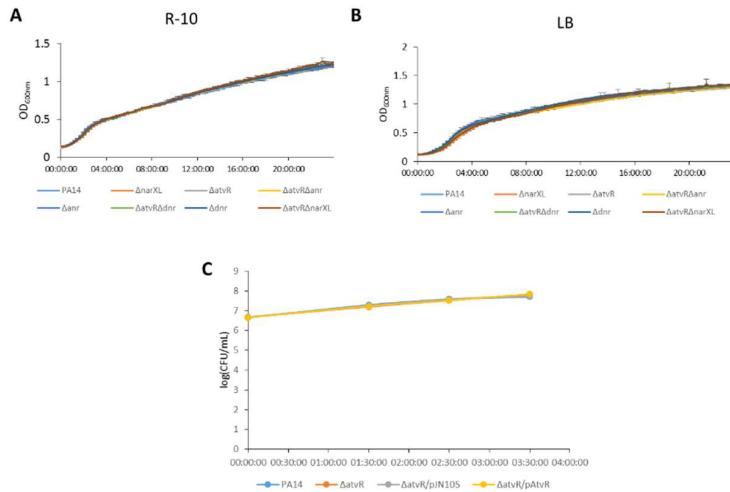

**Figure S1. Growth curves for denitrification regulators mutants in different conditions.** Cultures were pre-incubated overnight in LB (A) or R-10 (B) media and adjusted to OD<sub>600</sub> = 0.1 in LB or R-10. 1 mL samples were applied in a 24-well plate and growth was monitored as OD<sub>600</sub>, at 15 minutes intervals, with SpectraMax Paradigm at 37°C with low orbital agitation. (C) Bacterial strains were pre-incubated to OD<sub>600</sub> = 2.0 in LB with gentamicin and arabinose when required. The cultures were diluted in R-10 to 5x 10<sup>6</sup> bacteria/mL. 200 μL of the bacterial suspensions were added to a 96-well plate and incubated for 4 hours and 30 minutes at 37°C at 5% CO<sub>2</sub>, the same condition used for *in vitro* virulence assays. At the indicated time points, each culture was serially diluted, plated, and the CFU were enumerated. All curves were performed in triplicates.

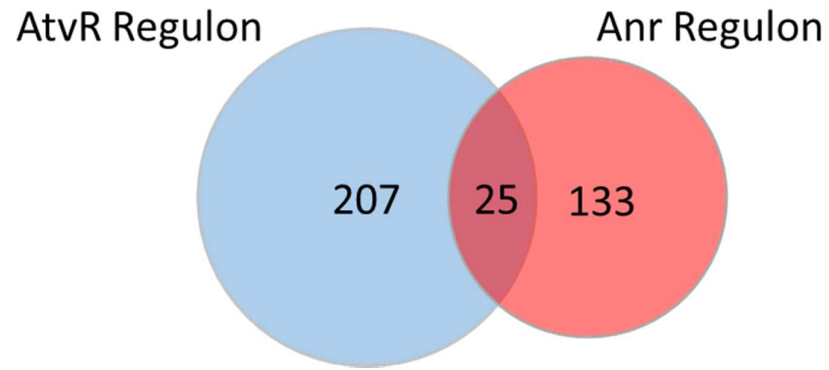

**Figure S2. AtvR and Anr regulons share few transcriptional units.** Our RNAseq data of AtvR-regulated transcriptional units (blue) was compared to the Anr transcriptome (red) described by Trunk et al., 2009 . 89% of the AtvR-induced genes are unique, not under Anr control.

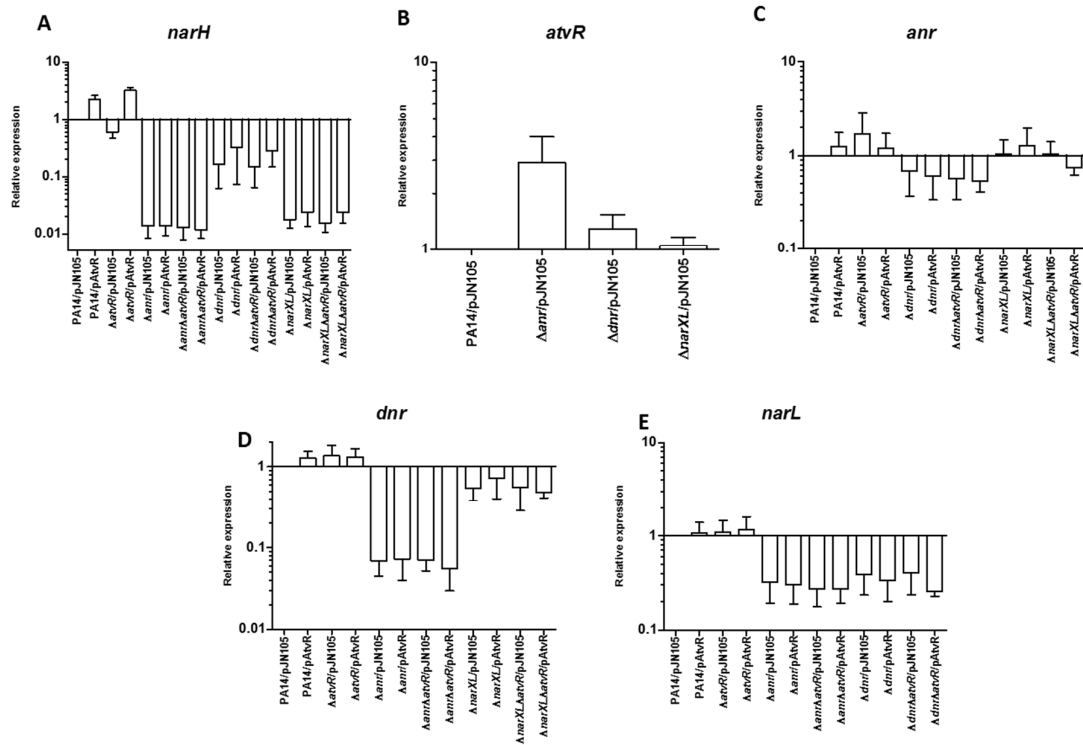

**Figure S3. AtvR is not part of the known denitrification regulatory cascade and is repressed by Anr under low O<sub>2</sub> levels.** The wild-type and the mutant strains harboring either pJN105 or pAtvR were grown in LB with 50mM nitrate and 0.2% arabinose under aerobic conditions until OD600 = 2. At this time point, cell cultures were transferred to a candle jar for four hours, RNA was extracted and qRT-PCR performed for the genes indicated at each graph. Relative expression levels were normalized for each gene in PA14/pJN105. These data were used to draw the heat map in Figure 7. \*, p<0.05; \*\*, p<0.01; \*\*\*, p<0.001

**Table S1. Strains and Plasmids used in this study**

| <b>Strains</b>              | <b>Description</b>                                                                                                                                            | <b>Reference</b> |
|-----------------------------|---------------------------------------------------------------------------------------------------------------------------------------------------------------|------------------|
| <b><i>P. aeruginosa</i></b> |                                                                                                                                                               |                  |
| PA14                        | Wild-type <i>P. aeruginosa</i> UCBPP-PA14                                                                                                                     | (2)              |
| PA14/pJN105                 | PA14 harboring pJN105 plasmid                                                                                                                                 | This Work        |
| PA14/pAtvR                  | PA14 harboring pAtvR plasmid                                                                                                                                  | This Work        |
| $\Delta atvR$               | PA14 with deletion in <i>atvR</i>                                                                                                                             | This Work        |
| $\Delta atvR$ /pJN105       | $\Delta atvR$ harboring pJN105 plasmid                                                                                                                        | This Work        |
| $\Delta atvR$ /pAtvR        | $\Delta atvR$ harboring pAtvR plasmid                                                                                                                         | This Work        |
| $\Delta anr$                | PA14 with deletion in <i>anr</i>                                                                                                                              | This Work        |
| $\Delta anr$ /pJN105        | $\Delta anr$ harboring pJN105 plasmid                                                                                                                         | This Work        |
| $\Delta anr$ /pAtvR         | $\Delta anr$ harboring pAtvR plasmid                                                                                                                          | This Work        |
| $\Delta dnr$                | PA14 with deletion in <i>anr</i>                                                                                                                              | This Work        |
| $\Delta dnr$ /pJN105        | $\Delta dnr$ harboring pJN105 plasmid                                                                                                                         | This Work        |
| $\Delta dnr$ /pAtvR         | $\Delta dnr$ harboring pAtvR plasmid                                                                                                                          | This Work        |
| $\Delta narXL$              | PA14 with deletion in <i>anr</i>                                                                                                                              | This Work        |
| $\Delta narXL$ /pJN105      | $\Delta narXL$ harboring pJN105 plasmid                                                                                                                       | This Work        |
| $\Delta narXL$ /pAtvR       | $\Delta narXL$ harboring pAtvR plasmid                                                                                                                        | This Work        |
| <b><i>E. coli</i></b>       |                                                                                                                                                               |                  |
| DH5 $\alpha$                | <i>supE44 lacU169</i> (80 <i>lacZ</i> M15) <i>hsdR17 recA1 endA11 gyrA96 thi-1 relA1</i>                                                                      | Invitrogen       |
| S17-1                       | <i>prothirecA hsdR</i> ( <i>r<sup>-</sup> m<sup>+</sup></i> ) <i>Tp<sup>r</sup> Sm<sup>r</sup> Km<sup>s</sup> [<math>\Lambda</math> RP4-2-Tc::Um-Km::Tn7]</i> | (3)              |
| <b>Macrophage</b>           |                                                                                                                                                               |                  |
| J774.A1                     | Monocyte/Macrophage cell line                                                                                                                                 | (4)              |
| <b>Plasmid</b>              |                                                                                                                                                               |                  |
| pGEM-T easy                 | Cloning vector; Ap <sup>r</sup>                                                                                                                               | Promega          |
| pNPTS138                    | Replicon ColE1,oriT, <i>npt</i> (Km <sup>r</sup> ), <i>sacB</i>                                                                                               | (5)              |

|         |                                                                                    |           |
|---------|------------------------------------------------------------------------------------|-----------|
| pEX18Ap | ApR; oriT+sacB+, gene replacement vector with MCS from pUC18                       | (6)       |
| pJN105  | araC-pBAD cloned in pBBR1 MCS-5; GmR                                               | (7)       |
| pAtvR   | <i>atvR</i> coding region cloned in pJN105                                         | This work |
| pGHK101 | 873 bp upstream of <i>atvR</i> coding region cloned in pGEM-T Easy                 | This work |
| pGHK002 | 793 bp downstream of <i>atvR</i> coding region cloned in pGEM-T Easy               | This work |
| pGHK003 | 873 bp upstream and 793 downstream of <i>atvR</i> coding region cloned in pNPTS138 | This work |
| pGHK006 | 1000 bp upstream and 1000 downstream of <i>anr</i> coding region cloned in pEX18Ap | This work |

---

**Table S3. Upregulated genes in PA14/patvR x PA14/pJN105**

| PA14 locus | PAO1 locus | gene  | logF C | FDR      | Operon                                                                                                                           |
|------------|------------|-------|--------|----------|----------------------------------------------------------------------------------------------------------------------------------|
| PA14_00820 | PA0070     | tagQ1 | 1,07   | 1,37E-02 | <b>PA14_00820</b> ;PA14_00830;PA14_00850;PA14_00860;PA14_00875;PA14_00890;PA14_00900;PA14_00910                                  |
| PA14_01030 | PA0085     | hcp1  | 1,08   | 1,04E-02 |                                                                                                                                  |
| PA14_01170 | PA0096     |       | 1,22   | 3,53E-02 | PA14_01160; <b>PA14_01170</b> ;PA14_01180;PA14_01190;PA14_01200;PA14_01220;PA14_01230                                            |
| PA14_01490 | PA0122     | rahU  | 1,07   | 4,83E-03 |                                                                                                                                  |
| PA14_02200 | PA0175     | cheR2 | 1,57   | 5,58E-04 | PA14_02180;PA14_02190; <b>PA14_02200</b> ;PA14_02220;PA14_02230;PA14_02250;PA14_02260                                            |
| PA14_02220 | PA0176     | aer2  | 1,76   | 4,65E-06 | PA14_02180;PA14_02190; <b>PA14_02200</b> ;PA14_02220;PA14_02230;PA14_02250;PA14_02260                                            |
| PA14_02230 | PA0177     | cheW  | 1,67   | 2,42E-05 | PA14_02180;PA14_02190; <b>PA14_02200</b> ;PA14_02220;PA14_02230;PA14_02250;PA14_02260                                            |
| PA14_02250 | PA0178     | cheA  | 1,66   | 6,67E-06 | PA14_02180;PA14_02190; <b>PA14_02200</b> ;PA14_02220;PA14_02230;PA14_02250;PA14_02260                                            |
| PA14_02260 | PA0179     |       | 1,43   | 1,62E-04 | PA14_02180;PA14_02190; <b>PA14_02200</b> ;PA14_02220;PA14_02230;PA14_02250;PA14_02260                                            |
| PA14_03510 | PA0270     |       | 1,30   | 3,63E-03 | PA14_03490; <b>PA14_03510</b> ;PA14_03520                                                                                        |
| PA14_04650 | PA0355     | pfpl  | 1,07   | 1,31E-02 |                                                                                                                                  |
| PA14_05820 | PA0446     |       | 1,54   | 1,81E-04 |                                                                                                                                  |
| PA14_05840 | PA0447     | gcdH  | 1,54   | 7,31E-04 |                                                                                                                                  |
| PA14_06000 | PA0459     | clpC  | 1,73   | 7,87E-04 |                                                                                                                                  |
| PA14_06650 | PA0509     | nirN  | 2,54   | 9,36E-13 | <b>PA14_06650</b> ;PA14_06660;PA14_06670;PA14_06680;PA14_06690;PA14_06700;PA14_06710;PA14_06720;PA14_06730;PA14_06740;PA14_06750 |
| PA14_06660 | PA0510     | nirE  | 3,25   | 3,31E-18 | <b>PA14_06650</b> ;PA14_06660;PA14_06670;PA14_06680;PA14_06690;PA14_06700;PA14_06710;PA14_06720;PA14_06730;PA14_06740;PA14_06750 |
| PA14_06670 | PA0511     | nirJ  | 2,85   | 1,77E-17 | <b>PA14_06650</b> ;PA14_06660;PA14_06670;PA14_06680;PA14_06690;PA14_06700;PA14_06710;PA14_06720;PA14_06730;PA14_06740;PA14_06750 |
| PA14_06680 | PA0512     | nirH  | 2,55   | 6,84E-13 | <b>PA14_06650</b> ;PA14_06660;PA14_06670;PA14_06680;PA14_06690;PA14_06700;PA14_06710;PA14_06720;PA14_06730;PA14_06740;PA14_06750 |
| PA14_06690 | PA0513     | nirG  | 2,34   | 1,20E-10 | <b>PA14_06650</b> ;PA14_06660;PA14_06670;PA14_06680;PA14_06690;PA14_06700;PA14_06710;PA14_06720;PA14_06730;PA14_06740;PA14_06750 |
| PA14_06700 | PA0514     | nirL  | 2,17   | 7,12E-10 | <b>PA14_06650</b> ;PA14_06660;PA14_06670;PA14_06680;PA14_06690;PA14_06700;PA14_06710;PA14_06720;PA14_06730;PA14_06740;PA14_06750 |
| PA14_06710 | PA0515     | nirD  | 1,93   | 1,70E-08 | <b>PA14_06650</b> ;PA14_06660;PA14_06670;PA14_06680;PA14_06690;PA14_06700;PA14_06710;PA14_06720;PA14_06730;PA14_06740;PA14_06750 |
| PA14_06720 | PA0516     | nirF  | 1,69   | 5,17E-07 | <b>PA14_06650</b> ;PA14_06660;PA14_06670;PA14_06680;PA14_06690;PA14_06700;PA14_06710;PA14_06720;PA14_06730;PA14_06740;PA14_06750 |
| PA14_06730 | PA0517     | nirC  | 1,98   | 6,73E-08 | <b>PA14_06650</b> ;PA14_06660;PA14_06670;PA14_06680;PA14_06690;PA14_06700;PA14_06710;PA14_06720;PA14_06730;PA14_06740;PA14_06750 |
| PA14_06740 | PA0518     | nirM  | 2,19   | 2,06E-09 | <b>PA14_06650</b> ;PA14_06660;PA14_06670;PA14_06680;PA14_06690;PA14_06700;PA14_06710;PA14_06720;PA14_06730;PA14_06740;PA14_06750 |
| PA14_06750 | PA0519     | nirS  | 1,69   | 1,62E-04 | <b>PA14_06650</b> ;PA14_06660;PA14_06670;PA14_06680;PA14_06690;PA14_06700;PA14_06710;PA14_06720;PA14_06730;PA14_06740;PA14_06750 |
| PA14_06770 | PA0520     | nirQ  | 1,50   | 1,50E-05 | PA14_06770;PA14_06790;PA14_06800                                                                                                 |
| PA14_06790 | PA0521     | nirO  | 1,27   | 1,04E-02 | PA14_06770;PA14_06790;PA14_06800                                                                                                 |
| PA14_06810 | PA0523     | norC  | 2,61   | 6,17E-05 | PA14_06810;PA14_06830;PA14_06840                                                                                                 |
| PA14_06830 | PA0524     | norB  | 2,90   | 7,34E-06 | PA14_06810;PA14_06830;PA14_06840                                                                                                 |
| PA14_06860 | PA0526     |       | 1,32   | 3,59E-02 | PA14_06860;PA14_06870                                                                                                            |
| PA14_07430 | PA0572     |       | 1,10   | 1,11E-02 |                                                                                                                                  |

|            |        |                    |      |          |                                                                                         |
|------------|--------|--------------------|------|----------|-----------------------------------------------------------------------------------------|
| PA14_07660 | PA0587 | yeaH               | 1,17 | 8,46E-03 | PA14_07650;PA14_07660;PA14_07680                                                        |
| PA14_07680 | PA0588 | yeaG               | 1,40 | 1,52E-03 | PA14_07650;PA14_07660;PA14_07680                                                        |
| PA14_09150 | PA4236 | katA               | 1,22 | 8,40E-03 |                                                                                         |
| PA14_09400 | PA4217 | phzS               | 1,89 | 4,95E-06 |                                                                                         |
| PA14_09410 | PA4216 | phzG1              | 2,84 | 2,68E-12 | PA14_09410;PA14_09420;PA14_09440;PA14_09450;PA14_09460                                  |
| PA14_09420 | PA4215 | phzF1              | 2,24 | 7,07E-07 | PA14_09410;PA14_09420;PA14_09440;PA14_09450;PA14_09460                                  |
| PA14_09440 | PA4214 | phzE1              | 2,56 | 1,94E-10 | PA14_09410;PA14_09420;PA14_09440;PA14_09450;PA14_09460                                  |
| PA14_09450 | PA4213 | phzD1              | 2,67 | 1,05E-08 | PA14_09410;PA14_09420;PA14_09440;PA14_09450;PA14_09460                                  |
| PA14_09460 | PA4212 | phzC1              | 3,19 | 1,74E-12 | PA14_09410;PA14_09420;PA14_09440;PA14_09450;PA14_09460                                  |
| PA14_09470 | PA4211 | phzB1              | 3,31 | 2,10E-14 |                                                                                         |
| PA14_09480 | PA4210 | phzA1              | 2,61 | 2,85E-07 |                                                                                         |
| PA14_09490 | PA4209 | phzM               | 1,43 | 3,19E-04 |                                                                                         |
| PA14_09500 | PA4208 | opmD               | 1,27 | 2,91E-03 | PA14_09500;PA14_09520;PA14_09530;PA14_09540                                             |
| PA14_10360 | PA4141 |                    | 1,01 | 1,74E-02 |                                                                                         |
| PA14_10470 | PA4136 | sur/bcr            | 1,29 | 3,02E-02 |                                                                                         |
| PA14_10490 | PA4134 |                    | 2,96 | 2,43E-13 | PA14_10490;PA14_10500                                                                   |
| PA14_10500 | PA4133 | cytN/cc<br>oN/fixN | 3,61 | 2,76E-12 | PA14_10490;PA14_10500                                                                   |
| PA14_10530 | PA4132 |                    | 2,99 | 1,75E-11 |                                                                                         |
| PA14_10540 | PA4131 |                    | 3,54 | 3,59E-09 |                                                                                         |
| PA14_10550 | PA4130 |                    | 2,48 | 2,39E-07 | PA14_10550;PA14_10560                                                                   |
| PA14_10560 | PA4129 |                    | 2,54 | 1,52E-10 | PA14_10550;PA14_10560                                                                   |
| PA14_10570 | PA4128 | hpcH               | 2,18 | 5,17E-07 | PA14_10570;PA14_10590;PA14_10600                                                        |
| PA14_10590 | PA4127 | hpcG               | 1,37 | 9,43E-04 | PA14_10570;PA14_10590;PA14_10600                                                        |
| PA14_11790 | PA4023 | eutP               | 1,01 | 2,66E-02 | PA14_11760;PA14_11770;PA14_11790                                                        |
| PA14_11810 | PA4022 | hdhA               | 2,05 | 2,44E-08 |                                                                                         |
| PA14_13030 | PA3930 | cioA               | 1,07 | 7,56E-03 | PA14_13030;PA14_13040;PA14_13050                                                        |
| PA14_13130 | PA3923 |                    | 1,05 | 3,01E-02 | PA14_13130;PA14_13140                                                                   |
| PA14_13140 | PA3922 |                    | 1,40 | 2,57E-03 | PA14_13130;PA14_13140                                                                   |
| PA14_13260 | PA3915 | moaB1              | 3,35 | 1,15E-21 | PA14_13260;PA14_13280                                                                   |
| PA14_13280 | PA3914 | moeA1              | 3,37 | 2,34E-20 | PA14_13260;PA14_13280                                                                   |
| PA14_13320 | PA3911 | yhbT               | 1,29 | 4,86E-04 | PA14_13290;PA14_13300;PA14_13320                                                        |
| PA14_13750 | PA3877 | narK1              | 1,86 | 1,71E-04 | PA14_13750;PA14_13770;PA14_13780;PA14_13800;PA14_13810;PA14_13830;PA14_13840;PA14_13850 |
| PA14_13770 | PA3876 | narK2              | 2,44 | 7,78E-11 | PA14_13750;PA14_13770;PA14_13780;PA14_13800;PA14_13810;PA14_13830;PA14_13840;PA14_13850 |
| PA14_13780 | PA3875 | narG               | 3,35 | 9,51E-13 | PA14_13750;PA14_13770;PA14_13780;PA14_13800;PA14_13810;PA14_13830;PA14_13840;PA14_13850 |
| PA14_13800 | PA3874 | narH               | 3,42 | 3,54E-09 | PA14_13750;PA14_13770;PA14_13780;PA14_13800;PA14_13810;PA14_13830;PA14_13840;PA14_13850 |



|            |        |       |      |          |                                                                                         |
|------------|--------|-------|------|----------|-----------------------------------------------------------------------------------------|
| PA14_13810 | PA3873 | narJ  | 3,18 | 6,77E-08 | PA14_13750;PA14_13770;PA14_13780;PA14_13800;PA14_13810;PA14_13830;PA14_13840;PA14_13850 |
| PA14_13830 | PA3872 | narI  | 3,27 | 7,62E-10 | PA14_13750;PA14_13770;PA14_13780;PA14_13800;PA14_13810;PA14_13830;PA14_13840;PA14_13850 |
| PA14_13840 | PA3871 |       | 2,12 | 7,34E-06 | PA14_13750;PA14_13770;PA14_13780;PA14_13800;PA14_13810;PA14_13830;PA14_13840;PA14_13850 |
| PA14_13850 | PA3870 | moaA  | 1,44 | 2,08E-02 | PA14_13750;PA14_13770;PA14_13780;PA14_13800;PA14_13810;PA14_13830;PA14_13840;PA14_13850 |
| PA14_15070 | PA3790 | oprC  | 1,02 | 1,43E-02 | PA14_15070;PA14_15080                                                                   |
| PA14_16250 | PA3724 | lasB  | 1,15 | 2,67E-03 |                                                                                         |
| PA14_16370 | PA3712 |       | 1,03 | 1,06E-02 |                                                                                         |
| PA14_16630 | PA3692 | lptF  | 1,16 | 2,17E-03 | PA14_16630;PA14_16640                                                                   |
| PA14_16640 | PA3691 |       | 1,26 | 5,20E-04 | PA14_16630;PA14_16640                                                                   |
| PA14_17480 | PA3622 | rpoS  | 1,32 | 1,52E-03 |                                                                                         |
| PA14_18120 | PA3570 | mmsA  | 1,40 | 8,83E-03 | PA14_18120;PA14_18140                                                                   |
| PA14_18140 | PA3569 | mmsB  | 1,44 | 2,37E-02 | PA14_18120;PA14_18140                                                                   |
| PA14_19100 | PA3479 | rhlA  | 1,38 | 1,62E-04 |                                                                                         |
| PA14_20190 | PA3393 | nosD  | 2,01 | 2,08E-02 | PA14_20150;PA14_20170;PA14_20180;PA14_20190;PA14_20200;PA14_20230                       |
| PA14_20200 | PA3392 | nosZ  | 2,91 | 1,26E-03 | PA14_20150;PA14_20170;PA14_20180;PA14_20190;PA14_20200;PA14_20230                       |
| PA14_20920 | PA3335 |       | 2,50 | 3,01E-11 |                                                                                         |
| PA14_20940 | PA3334 |       | 2,65 | 1,14E-10 | PA14_20940;PA14_20950;PA14_20960;PA14_20970;PA14_20980;PA14_21000;PA14_21010;PA14_21020 |
| PA14_20950 | PA3333 | fabH2 | 2,59 | 3,17E-10 | PA14_20940;PA14_20950;PA14_20960;PA14_20970;PA14_20980;PA14_21000;PA14_21010;PA14_21020 |
| PA14_20960 | PA3332 |       | 2,61 | 1,25E-10 | PA14_20940;PA14_20950;PA14_20960;PA14_20970;PA14_20980;PA14_21000;PA14_21010;PA14_21020 |
| PA14_20970 | PA3331 | cyp23 | 2,60 | 2,34E-10 | PA14_20940;PA14_20950;PA14_20960;PA14_20970;PA14_20980;PA14_21000;PA14_21010;PA14_21020 |
| PA14_20980 | PA3330 |       | 2,96 | 1,52E-10 | PA14_20940;PA14_20950;PA14_20960;PA14_20970;PA14_20980;PA14_21000;PA14_21010;PA14_21020 |
| PA14_21000 | PA3329 |       | 2,59 | 6,24E-10 | PA14_20940;PA14_20950;PA14_20960;PA14_20970;PA14_20980;PA14_21000;PA14_21010;PA14_21020 |
| PA14_21010 | PA3328 |       | 2,51 | 1,13E-08 | PA14_20940;PA14_20950;PA14_20960;PA14_20970;PA14_20980;PA14_21000;PA14_21010;PA14_21020 |
| PA14_21020 | PA3327 |       | 2,20 | 5,66E-07 | PA14_20940;PA14_20950;PA14_20960;PA14_20970;PA14_20980;PA14_21000;PA14_21010;PA14_21020 |
| PA14_21030 | PA3326 | clpP2 | 1,87 | 1,12E-06 |                                                                                         |
| PA14_21220 | PA3309 | uspK  | 1,13 | 3,12E-03 |                                                                                         |
| PA14_23000 | PA3188 | gltG  | 1,15 | 4,81E-03 | PA14_22990;PA14_23000;PA14_23010;PA14_23030                                             |
| PA14_23010 | PA3187 | gltK  | 1,00 | 1,66E-02 | PA14_22990;PA14_23000;PA14_23010;PA14_23030                                             |
| PA14_23030 | PA3186 | oprB  | 1,08 | 5,99E-03 | PA14_22990;PA14_23000;PA14_23010;PA14_23030                                             |
| PA14_24650 | PA3049 | rmf   | 1,19 | 2,53E-02 |                                                                                         |
| PA14_24740 | PA3042 |       | 1,49 | 1,61E-04 | PA14_24740;PA14_24760;PA14_24770                                                        |
| PA14_24760 | PA3041 | yqjE  | 1,58 | 7,68E-06 | PA14_24740;PA14_24760;PA14_24770                                                        |
| PA14_24770 | PA3040 | yqjD  | 1,40 | 9,44E-05 | PA14_24740;PA14_24760;PA14_24770                                                        |
| PA14_24980 | PA3022 |       | 1,16 | 2,30E-03 |                                                                                         |
| PA14_26020 | PA2939 | pepB  | 1,18 | 5,51E-03 |                                                                                         |
| PA14_26570 | PA2899 | atvR  | 8,16 | 6,62E-79 | PA14_26570;PA14_26580                                                                   |

|            |        |       |      |          |                                                                                                                          |
|------------|--------|-------|------|----------|--------------------------------------------------------------------------------------------------------------------------|
| PA14_26580 | PA2898 |       | 1,24 | 1,55E-02 | PA14_26570;PA14_26580                                                                                                    |
| PA14_27730 | PA2815 | fadE  | 1,03 | 1,38E-02 |                                                                                                                          |
| PA14_28050 | PA2788 |       | 1,72 | 6,39E-07 |                                                                                                                          |
| PA14_28060 | PA2787 | cpg2  | 1,74 | 9,72E-06 |                                                                                                                          |
| PA14_28960 | PA2721 |       | 1,68 | 4,02E-02 |                                                                                                                          |
| PA14_29330 | -      |       | 1,01 | 4,19E-02 |                                                                                                                          |
| PA14_31510 | PA2554 |       | 1,62 | 9,72E-06 | PA14_31500;PA14_31510;PA14_31530;PA14_31540                                                                              |
| PA14_31530 | PA2553 |       | 1,85 | 1,11E-07 | PA14_31500;PA14_31510;PA14_31530;PA14_31540                                                                              |
| PA14_31540 | PA2552 | acdB  | 1,36 | 1,41E-03 | PA14_31500;PA14_31510;PA14_31530;PA14_31540                                                                              |
| PA14_33300 | -      |       | 1,79 | 1,12E-07 | PA14_33300;PA14_33310;PA14_33320;PA14_33330                                                                              |
| PA14_33310 | -      |       | 1,73 | 2,81E-06 | PA14_33300;PA14_33310;PA14_33320;PA14_33330                                                                              |
| PA14_33320 | -      |       | 1,65 | 2,31E-04 | PA14_33300;PA14_33310;PA14_33320;PA14_33330                                                                              |
| PA14_33330 | -      |       | 1,33 | 4,49E-03 | PA14_33300;PA14_33310;PA14_33320;PA14_33330                                                                              |
| PA14_33370 | PA2422 |       | 1,94 | 3,61E-02 |                                                                                                                          |
| PA14_33870 | PA2381 |       | 1,47 | 2,17E-03 |                                                                                                                          |
| PA14_34020 | PA2368 | hsiF3 | 5,92 | 1,69E-02 | PA14_33940;PA14_33960;PA14_33970;PA14_33980;PA14_33990;PA14_34000;PA14_34010;PA14_34020;PA14_34030;PA14_34050;PA14_34070 |
| PA14_34820 | PA2304 | ambC  | 2,02 | 7,55E-06 | PA14_34810;PA14_34820;PA14_34830;PA14_34840;PA14_34850                                                                   |
| PA14_34830 | PA2303 | ambD  | 1,27 | 2,45E-03 | PA14_34810;PA14_34820;PA14_34830;PA14_34840;PA14_34850                                                                   |
| PA14_34840 | PA2302 | ambE  | 1,57 | 1,04E-05 | PA14_34810;PA14_34820;PA14_34830;PA14_34840;PA14_34850                                                                   |
| PA14_35150 | PA2275 | yahK  | 1,36 | 1,62E-04 |                                                                                                                          |
| PA14_35490 | PA2250 | lpdV  | 1,43 | 4,22E-05 | PA14_35490;PA14_35500;PA14_35520;PA14_35530                                                                              |
| PA14_35500 | PA2249 | bkdB  | 1,36 | 2,64E-04 | PA14_35490;PA14_35500;PA14_35520;PA14_35530                                                                              |
| PA14_35520 | PA2248 | bkdA2 | 1,31 | 9,47E-04 | PA14_35490;PA14_35500;PA14_35520;PA14_35530                                                                              |
| PA14_35530 | PA2247 | bkdA1 | 1,17 | 1,14E-02 | PA14_35490;PA14_35500;PA14_35520;PA14_35530                                                                              |
| PA14_35780 | -      |       | 1,31 | 2,26E-04 | PA14_35780;PA14_35790                                                                                                    |
| PA14_35790 | -      |       | 1,17 | 1,87E-03 | PA14_35780;PA14_35790                                                                                                    |
| PA14_36310 | PA2195 | hcnC  | 2,16 | 1,45E-06 | PA14_36310;PA14_36320;PA14_36330                                                                                         |
| PA14_36320 | PA2194 | hcnB  | 1,67 | 6,79E-05 | PA14_36310;PA14_36320;PA14_36330                                                                                         |
| PA14_36330 | PA2193 | hcnA  | 1,01 | 2,98E-02 | PA14_36310;PA14_36320;PA14_36330                                                                                         |
| PA14_36560 | PA2166 |       | 1,05 | 3,60E-02 |                                                                                                                          |
| PA14_36580 | PA2164 |       | 1,43 | 3,43E-02 | PA14_36570;PA14_36580;PA14_36590;PA14_36605;PA14_36620;PA1436630                                                         |
| PA14_36650 | PA2159 |       | 2,33 | 1,84E-02 | PA14_36650;PA14_36660;PA14_36670;PA14_36680;PA14_36690;PA14_36700                                                        |
| PA14_36830 | PA2145 |       | 1,43 | 4,12E-02 |                                                                                                                          |
| PA14_37080 | PA2126 | cgrC  | 1,02 | 3,88E-02 |                                                                                                                          |
| PA14_37090 | PA2125 |       | 1,01 | 2,81E-02 | PA14_37090;PA14_37100                                                                                                    |
| PA14_37745 | PA2069 |       | 1,79 | 8,05E-06 | PA14_37745;PA14_37760;PA14_37770;PA14_37780                                                                              |

|            |        |        |      |          |                                                                                                                          |
|------------|--------|--------|------|----------|--------------------------------------------------------------------------------------------------------------------------|
| PA14_38020 | PA2048 |        | 1,22 | 2,16E-02 |                                                                                                                          |
| PA14_38480 | PA2012 | gnyA   | 1,61 | 2,30E-06 | PA14_38440;PA14_38460;PA14_38470;PA14_38480;PA14_38490                                                                   |
| PA14_38490 | PA2011 | gnyL   | 1,50 | 2,11E-05 | PA14_38440;PA14_38460;PA14_38470;PA14_38480;PA14_38490                                                                   |
| PA14_38590 | PA2003 | bdhA   | 1,46 | 4,79E-04 |                                                                                                                          |
| PA14_38610 | PA2002 | atoE   | 1,16 | 1,43E-02 |                                                                                                                          |
| PA14_38630 | PA2001 | atoB   | 1,74 | 2,42E-06 |                                                                                                                          |
| PA14_38640 | PA2000 | atoA   | 1,68 | 4,65E-06 | PA14_38640;PA14_38660                                                                                                    |
| PA14_38660 | PA1999 | atoD   | 1,73 | 1,21E-04 | PA14_38640;PA14_38660                                                                                                    |
| PA14_38840 | PA1984 | exaC   | 1,88 | 8,98E-07 | PA14_38840;PA14_38850                                                                                                    |
| PA14_39270 | PA1951 | fapF   | 1,03 | 1,31E-02 |                                                                                                                          |
| PA14_39280 | PA1950 | rbsK   | 1,31 | 3,17E-04 | PA14_39280;PA14_39300;PA14_39320;PA14_39330;PA14_39350                                                                   |
| PA14_39560 | PA1930 |        | 1,16 | 4,80E-02 |                                                                                                                          |
| PA14_39700 | -      |        | 1,64 | 1,68E-04 | PA14_39690;PA14_39700;PA14_39710                                                                                         |
| PA14_39710 | PA1919 | nrdG   | 1,35 | 1,61E-03 | PA14_39690;PA14_39700;PA14_39710                                                                                         |
| PA14_39880 | PA4216 | phzG2  | 1,99 | 3,12E-06 | PA14_39880;PA14_39890;PA14_39910;PA14_39925;PA14_39945;PA14_39960                                                        |
| PA14_39890 | PA4215 | phzF2  | 2,24 | 7,07E-07 | PA14_39880;PA14_39890;PA14_39910;PA14_39925;PA14_39945;PA14_39960                                                        |
| PA14_39910 | PA4214 | phzE2  | 2,43 | 1,22E-08 | PA14_39880;PA14_39890;PA14_39910;PA14_39925;PA14_39945;PA14_39960                                                        |
| PA14_39925 | PA4213 | phzD2  | 2,70 | 2,50E-08 | PA14_39880;PA14_39890;PA14_39910;PA14_39925;PA14_39945;PA14_39960                                                        |
| PA14_39945 | PA4212 | phzC2  | 2,44 | 4,00E-10 | PA14_39880;PA14_39890;PA14_39910;PA14_39925;PA14_39945;PA14_39960                                                        |
| PA14_39960 | PA4211 | phzB2  | 2,72 | 7,51E-11 | PA14_39880;PA14_39890;PA14_39910;PA14_39925;PA14_39945;PA14_39960                                                        |
| PA14_39970 | PA4210 | phzA2  | 1,83 | 1,67E-03 |                                                                                                                          |
| PA14_40300 | PA1870 |        | 1,15 | 5,00E-02 |                                                                                                                          |
| PA14_42900 | PA1669 | icmF2  | 1,13 | 2,72E-03 | PA14_42880;PA14_42890;PA14_42900;PA14_42910;PA14_42920;PA14_42940;PA14_42950;PA14_42960;PA14_42970;PA14_42980;PA14_42990 |
| PA14_42910 | PA1668 | dotU2  | 1,45 | 7,57E-04 | PA14_42880;PA14_42890;PA14_42900;PA14_42910;PA14_42920;PA14_42940;PA14_42950;PA14_42960;PA14_42970;PA14_42980;PA14_42990 |
| PA14_42920 | PA1667 | hsiJ2  | 1,07 | 6,75E-03 | PA14_42880;PA14_42890;PA14_42900;PA14_42910;PA14_42920;PA14_42940;PA14_42950;PA14_42960;PA14_42970;PA14_42980;PA14_42990 |
| PA14_42940 | PA1666 | lip2.1 | 1,46 | 7,14E-04 | PA14_42880;PA14_42890;PA14_42900;PA14_42910;PA14_42920;PA14_42940;PA14_42950;PA14_42960;PA14_42970;PA14_42980;PA14_42990 |
| PA14_42950 | PA1665 | fha2   | 1,88 | 1,82E-05 | PA14_42880;PA14_42890;PA14_42900;PA14_42910;PA14_42920;PA14_42940;PA14_42950;PA14_42960;PA14_42970;PA14_42980;PA14_42990 |
| PA14_42970 | PA1663 | sfa2   | 1,24 | 1,46E-02 | PA14_42880;PA14_42890;PA14_42900;PA14_42910;PA14_42920;PA14_42940;PA14_42950;PA14_42960;PA14_42970;PA14_42980;PA14_42990 |
| PA14_42980 | PA1662 | clpV2  | 1,32 | 2,89E-04 | PA14_42880;PA14_42890;PA14_42900;PA14_42910;PA14_42920;PA14_42940;PA14_42950;PA14_42960;PA14_42970;PA14_42980;PA14_42990 |
| PA14_42990 | PA1661 | hsiH2  | 1,31 | 7,51E-04 | PA14_42880;PA14_42890;PA14_42900;PA14_42910;PA14_42920;PA14_42940;PA14_42950;PA14_42960;PA14_42970;PA14_42980;PA14_42990 |
| PA14_43000 | PA1660 | hsiG2  | 1,37 | 1,83E-04 |                                                                                                                          |
| PA14_43020 | PA1659 |        | 1,30 | 3,17E-03 | PA14_43020;PA14_43030;PA14_43040;PA14_43050                                                                              |
| PA14_43030 | PA1658 | hsiC2  | 1,58 | 4,80E-06 | PA14_43020;PA14_43030;PA14_43040;PA14_43050                                                                              |
| PA14_43040 | PA1657 | hsiB2  | 1,71 | 4,99E-07 | PA14_43020;PA14_43030;PA14_43040;PA14_43050                                                                              |
| PA14_44290 | PA1656 | hsiA2  | 1,04 | 1,03E-02 |                                                                                                                          |
| PA14_44340 | PA1557 | ccoN2  | 1,16 | 2,39E-02 | PA14_44340;PA14_44350                                                                                                    |

|            |        |       |      |          |                                                                           |
|------------|--------|-------|------|----------|---------------------------------------------------------------------------|
| PA14_44350 | PA1556 | ccoO2 | 1,80 | 2,31E-04 | <b>PA14_44340;PA14_44350</b>                                              |
| PA14_44360 | PA1555 | ccoP2 | 1,89 | 1,25E-05 |                                                                           |
| PA14_46910 | PA1342 | aatJ  | 1,17 | 5,01E-03 |                                                                           |
| PA14_46930 | PA1340 | aatM  | 1,01 | 2,23E-02 | PA14_46920; <b>PA14_46930</b> ;PA14_46950                                 |
| PA14_46970 | PA1337 | ansB  | 1,88 | 1,45E-06 | <b>PA14_46970</b> ;PA14_46980;PA14_46990                                  |
| PA14_47120 | PA1324 |       | 1,25 | 7,51E-04 | <b>PA14_47120;PA14_47130</b>                                              |
| PA14_47130 | PA1323 |       | 1,01 | 1,08E-02 | <b>PA14_47120;PA14_47130</b>                                              |
| PA14_47850 | PA1267 |       | 1,35 | 2,12E-02 | PA14_47840; <b>PA14_47850</b>                                             |
| PA14_48060 | PA1249 | aprA  | 2,19 | 9,42E-11 |                                                                           |
| PA14_48090 | PA1248 | aprF  | 1,32 | 2,35E-04 | <b>PA14_48090;PA14_48100;PA14_48115</b> ;PA14_48140                       |
| PA14_48100 | PA1247 | aprE  | 1,12 | 1,06E-02 | <b>PA14_48090;PA14_48100;PA14_48115</b> ;PA14_48140                       |
| PA14_48115 | PA1246 | aprD  | 1,18 | 4,07E-03 | <b>PA14_48090;PA14_48100;PA14_48115</b> ;PA14_48140                       |
| PA14_48760 | PA1202 | ycaC  | 1,40 | 1,28E-03 |                                                                           |
| PA14_49210 | PA1177 | napE  | 1,45 | 9,96E-03 | <b>PA14_49210;PA14_49220;PA14_49230;PA14_49250</b> ;PA14_49260;PA14_49270 |
| PA14_49220 | PA1176 | napF  | 1,60 | 1,91E-04 | <b>PA14_49210;PA14_49220;PA14_49230;PA14_49250</b> ;PA14_49260;PA14_49270 |
| PA14_49230 | PA1175 | napD  | 1,35 | 2,84E-02 | <b>PA14_49210;PA14_49220;PA14_49230;PA14_49250</b> ;PA14_49260;PA14_49270 |
| PA14_49250 | PA1174 | napA  | 1,17 | 3,08E-03 | <b>PA14_49210;PA14_49220;PA14_49230;PA14_49250</b> ;PA14_49260;PA14_49270 |
| PA14_49850 | PA1173 |       | 2,13 | 7,12E-10 |                                                                           |
| PA14_49860 | PA1172 |       | 1,53 | 6,29E-04 |                                                                           |
| PA14_50880 | PA1041 |       | 1,50 | 2,04E-04 |                                                                           |
| PA14_53040 | PA0867 | mliC  | 1,12 | 1,87E-03 |                                                                           |
| PA14_53740 | PA0814 |       | 1,18 | 3,60E-02 | <b>PA14_53740</b> ;PA14_53750                                             |
| PA14_54540 | PA0754 |       | 1,16 | 1,06E-02 | PA14_54520; <b>PA14_54540</b> ;PA14_54550;PA14_54570;PA14_54580           |
| PA14_54630 | PA0746 |       | 1,57 | 2,90E-04 | PA14_54620; <b>PA14_54630</b>                                             |
| PA14_54640 | PA0745 |       | 1,89 | 6,75E-08 | <b>PA14_54640</b> ;PA14_54660                                             |
| PA14_54660 | PA0744 |       | 1,96 | 9,19E-09 |                                                                           |
| PA14_54670 | PA0743 |       | 1,67 | 4,28E-06 |                                                                           |
| PA14_55110 | PA0713 |       | 2,40 | 1,13E-05 |                                                                           |
| PA14_55790 | PA4294 |       | 1,44 | 3,11E-02 | PA14_55780; <b>PA14_55790</b>                                             |
| PA14_56550 | PA4349 |       | 1,08 | 4,80E-03 | PA14_56510;PA14_56520;PA14_56530;PA14_56540; <b>PA14_56550</b>            |
| PA14_56560 | PA4350 | olsB  | 1,12 | 2,05E-02 | <b>PA14_56560</b> ;PA14_56570                                             |
| PA14_58350 | PA4496 | dppA1 | 1,20 | 2,11E-03 | <b>PA14_58350</b> ;PA14_58360                                             |
| PA14_59770 | -      | rscB  | 1,01 | 1,51E-02 | <b>PA14_59770</b> ;PA14_59780;PA14_59790;PA14_59800                       |
| PA14_60570 | PA4578 |       | 1,02 | 9,17E-03 | <b>PA14_60570</b> ;PA14_60580                                             |
| PA14_60700 | PA4587 | ccpR  | 2,71 | 1,29E-11 |                                                                           |
| PA14_60750 | PA4590 | pra   | 1,08 | 5,66E-03 |                                                                           |

|            |        |       |      |          |                                                                                       |
|------------|--------|-------|------|----------|---------------------------------------------------------------------------------------|
| PA14_60960 | PA4607 |       | 1,70 | 2,02E-06 |                                                                                       |
| PA14_62680 | PA4738 | yjbJ  | 1,23 | 1,43E-02 | <b>PA14_62680;PA14_62690</b>                                                          |
| PA14_62690 | PA4739 |       | 1,13 | 1,80E-02 |                                                                                       |
| PA14_64360 | PA4866 |       | 1,23 | 2,85E-02 | PA14_64310;PA14_64320;PA14_64335;PA14_64350; <b>PA14_64360</b> ;PA14_64370;PA14_64390 |
| PA14_68260 | PA5167 | dctP  | 1,24 | 1,06E-02 | <b>PA14_68260;PA14_68280</b> ;PA14_68290                                              |
| PA14_68280 | PA5168 | dctQ  | 1,21 | 4,60E-02 |                                                                                       |
| PA14_68330 | PA5171 | arcA  | 1,20 | 2,44E-02 | PA14_68300; <b>PA14_68330</b> ; <b>PA14_68340</b> ; <b>PA14_68350</b>                 |
| PA14_68340 | PA5172 | arcB  | 2,12 | 5,14E-09 | PA14_68300; <b>PA14_68330</b> ; <b>PA14_68340</b> ; <b>PA14_68350</b>                 |
| PA14_68350 | PA5173 | arcC  | 2,44 | 1,02E-12 | PA14_68300; <b>PA14_68330</b> ; <b>PA14_68340</b> ; <b>PA14_68350</b>                 |
| PA14_68940 | PA5220 |       | 1,38 | 1,41E-04 | PA14_68930; <b>PA14_68940</b>                                                         |
| PA14_70670 | PA5353 | glcF  | 2,19 | 1,50E-05 | PA14_70650; <b>PA14_70670</b> ; <b>PA14_70680</b> ; <b>PA14_70690</b>                 |
| PA14_70680 | PA5354 | glcE  | 2,52 | 1,70E-06 | PA14_70650; <b>PA14_70670</b> ; <b>PA14_70680</b> ; <b>PA14_70690</b>                 |
| PA14_70690 | PA5355 | glcD  | 2,27 | 5,66E-07 | PA14_70650; <b>PA14_70670</b> ; <b>PA14_70680</b> ; <b>PA14_70690</b>                 |
| PA14_72520 | PA5496 | nrdJb | 1,27 | 7,22E-03 | <b>PA14_72520</b> ;PA14_72540                                                         |

**Table S4. Downregulated genes in PA14/patvR x PA14/pJN105**

| PA14 locus | PAO1 locus | gene  | logFC | FDR      | Operon                                      |
|------------|------------|-------|-------|----------|---------------------------------------------|
| PA14_02130 | PA0170     |       | -1,04 | 2,39E-02 | PA14_02130;PA14_02140;PA14_02150            |
| PA14_02140 | PA0171     |       | -1,19 | 7,56E-03 | PA14_02130;PA14_02140;PA14_02150            |
| PA14_02150 | PA0172     |       | -1,04 | 1,29E-02 | PA14_02130;PA14_02140;PA14_02150            |
| PA14_03770 | PA0288     | speB1 | -1,08 | 2,97E-02 | PA14_03760;PA14_03770;PA14_03780            |
| PA14_04050 | PA0310     |       | -1,07 | 1,38E-02 |                                             |
| PA14_04060 | PA0311     |       | -1,32 | 8,83E-03 |                                             |
| PA14_06170 | PA0471     | fiuR  | -1,49 | 4,35E-04 | PA14_06170;PA14_06180                       |
| PA14_06870 | PA0527     | dnr   | -1,07 | 9,80E-03 | PA14_06860;PA14_06870                       |
| PA14_07290 | PA0560     | ygjP  | -1,09 | 8,81E-03 | PA14_07290;PA14_07300                       |
| PA14_07550 | PA0578     |       | -1,13 | 9,17E-03 | PA14_07550;PA14_07560                       |
| PA14_08390 | PA0654     | speD  | -1,10 | 4,21E-02 |                                             |
| PA14_12180 | PA3990     |       | -1,11 | 2,44E-02 | PA14_12180;PA14_12200;PA14_12210            |
| PA14_12550 | PA3967     |       | -1,49 | 7,87E-04 |                                             |
| PA14_16350 | PA3714     |       | -1,09 | 2,05E-02 |                                             |
| PA14_17000 | PA3661     |       | -1,44 | 4,60E-02 |                                             |
| PA14_17610 | PA3610     | potD  | -1,78 | 1,70E-06 | PA14_17610;PA14_17620;PA14_17630;PA14_17640 |
| PA14_17630 | PA3608     | potB  | -1,47 | 2,12E-03 | PA14_17610;PA14_17620;PA14_17630;PA14_17640 |
| PA14_19470 | PA3452     | mqaA  | -1,52 | 6,62E-04 |                                             |
| PA14_19720 | PA3428     |       | -2,03 | 4,03E-02 |                                             |
| PA14_20070 | PA3403     |       | -1,31 | 7,56E-03 |                                             |
| PA14_26400 | PA2912     |       | -1,18 | 8,00E-03 | PA14_26360;PA14_26390;PA14_26400;PA14_26420 |
| PA14_31160 | PA4076     |       | -2,35 | 3,70E-06 | PA14_31160;PA14_31170                       |
| PA14_31170 | PA4077     |       | -2,93 | 8,55E-08 | PA14_31160;PA14_31170                       |
| PA14_33520 | PA2411     |       | -1,81 | 1,61E-03 | PA14_33500;PA14_33510;PA14_33520            |
| PA14_33530 | PA2410     |       | -2,91 | 1,26E-17 | PA14_33530;PA14_33540;PA14_33550;PA14_33560 |
| PA14_33540 | PA2409     |       | -3,17 | 1,84E-17 | PA14_33530;PA14_33540;PA14_33550;PA14_33560 |
| PA14_33550 | PA2408     |       | -3,15 | 2,28E-14 | PA14_33530;PA14_33540;PA14_33550;PA14_33560 |
| PA14_33560 | PA2407     |       | -3,26 | 8,93E-16 | PA14_33530;PA14_33540;PA14_33550;PA14_33560 |
| PA14_33570 | PA2406     |       | -2,70 | 1,80E-12 | PA14_33570;PA14_33580;PA14_33590;PA14_33600 |
| PA14_33580 | PA2405     |       | -2,61 | 2,11E-09 | PA14_33570;PA14_33580;PA14_33590;PA14_33600 |
| PA14_33590 | PA2404     |       | -3,17 | 4,57E-11 | PA14_33570;PA14_33580;PA14_33590;PA14_33600 |
| PA14_33600 | PA2403     |       | -1,97 | 3,91E-08 | PA14_33570;PA14_33580;PA14_33590;PA14_33600 |

|            |        |      |       |          |                                                                                                  |
|------------|--------|------|-------|----------|--------------------------------------------------------------------------------------------------|
| PA14_33680 | PA2398 | fpvA | -2,95 | 1,67E-12 |                                                                                                  |
| PA14_33770 | PA2389 | pvdR | -1,19 | 8,54E-03 |                                                                                                  |
| PA14_33810 | PA2386 | pvdA | -1,49 | 2,46E-04 |                                                                                                  |
| PA14_33830 | PA2384 |      | -2,87 | 9,19E-09 | <b>PA14_33830;PA14_33840</b>                                                                     |
| PA14_34170 | PA2358 |      | -1,28 | 1,17E-02 |                                                                                                  |
| PA14_35440 | PA2253 | ansA | -1,23 | 3,74E-03 |                                                                                                  |
| PA14_35460 | PA2252 |      | -2,95 | 1,12E-11 |                                                                                                  |
| PA14_38320 | PA2026 |      | -1,28 | 9,62E-04 |                                                                                                  |
| PA14_42640 | PA1691 | pscT | -1,09 | 9,96E-03 | PA14_42570;PA14_42580;PA14_42600;PA14_42610;PA14_42620;PA14_42630; <b>PA14_42640</b> ;PA14_42660 |
| PA14_43380 | PA1634 | kdpB | -1,25 | 1,51E-02 | PA14_43370; <b>PA14_43380;PA14_43400</b> ;PA14_43405                                             |
| PA14_43400 | PA1633 | kdpA | -1,37 | 3,17E-03 | PA14_43370; <b>PA14_43380;PA14_43400</b> ;PA14_43405                                             |
| PA14_47150 | PA1321 | cyoE | -1,65 | 3,17E-03 | <b>PA14_47150</b> ;PA14_47160; <b>PA14_47180</b> ;PA14_47190;PA14_47210                          |
| PA14_47180 | PA1319 | cyoC | -1,44 | 3,34E-04 | <b>PA14_47150</b> ;PA14_47160; <b>PA14_47180</b> ;PA14_47190;PA14_47210                          |
| PA14_48400 | PA1228 |      | -1,29 | 3,77E-03 |                                                                                                  |
| PA14_48410 | PA1227 |      | -1,08 | 6,51E-03 |                                                                                                  |
| PA14_48830 | PA1196 |      | -1,75 | 7,26E-05 | PA14_48810; <b>PA14_48830</b>                                                                    |
| PA14_51680 | PA0975 |      | -1,06 | 6,71E-03 | PA14_51670; <b>PA14_51680</b>                                                                    |
| PA14_54850 | -      |      | -1,06 | 1,14E-02 |                                                                                                  |
| PA14_56840 | PA4371 |      | -1,13 | 1,74E-02 | <b>PA14_56840</b> ;PA14_56850;PA14_56870                                                         |
| PA14_61850 | PA4675 | chtA | -1,04 | 1,91E-02 |                                                                                                  |
| PA14_62880 | PA4753 | yhbY | -1,09 | 3,72E-03 |                                                                                                  |
| PA14_63080 | PA4770 | lldP | -2,61 | 1,52E-07 |                                                                                                  |
| PA14_63090 | PA4771 | lldD | -2,63 | 4,05E-09 | <b>PA14_63090;PA14_63100</b>                                                                     |
| PA14_63100 | PA4772 |      | -2,76 | 3,63E-10 | <b>PA14_63090;PA14_63100</b>                                                                     |
| PA14_64610 | PA4888 |      | -1,27 | 5,53E-03 | <b>PA14_64610;PA14_64620</b>                                                                     |
| PA14_64620 | PA4889 |      | -1,65 | 8,00E-04 | <b>PA14_64610;PA14_64620</b>                                                                     |
| PA14_69250 | PA5244 | yohD | -1,21 | 2,67E-03 |                                                                                                  |
| PA14_71330 | PA5403 |      | -1,11 | 1,17E-02 | PA14_71320; <b>PA14_71330</b> ;PA14_71340; <b>PA14_71350</b> ;PA14_71360;PA14_71370              |
| PA14_71350 | PA5405 |      | -1,05 | 2,71E-02 | PA14_71320; <b>PA14_71330</b> ;PA14_71340; <b>PA14_71350</b> ;PA14_71360;PA14_71370              |
| PA14_71750 | PA5437 |      | -1,01 | 1,55E-02 |                                                                                                  |
| PA14_72350 | PA5480 |      | -1,11 | 1,52E-02 |                                                                                                  |

## Supplementary References

1. **Trunk K, Benkert B, Quäck N, Münch R, Scheer M, Garbe J, Jänsch L, Trost M, Wehland J, Buer J, Jahn M, Schobert M, Jahn D.** 2009. Anaerobic adaptation in *Pseudomonas aeruginosa*: definition of the Anr and Dnr regulons. *Environ Microbiol* **12**:1719–1733.
2. **Rahme LG, Stevens EJ, Wolfort SF, Shao J, Tompkins RG, Ausubel FM.** 1995. Common virulence factors for bacterial pathogenicity in plants and animals. *Science* **268**:1899–902.
3. **Simon R, Priefer U, Pühler A.** 1983. A Broad Host Range Mobilization System for In Vivo Genetic Engineering: Transposon Mutagenesis in Gram Negative Bacteria. *Bio/Technology* **1**:784–791.
4. **Snyderman R, Pike MC, Fischer DG, Koren HS.** 1977. Biologic and biochemical activities of continuous macrophage cell lines P388D1 and J774.1. *J Immunol* **119**:2060–6.
5. **Tsai JW, Alley MR.** 2000. Proteolysis of the McpA chemoreceptor does not require the *Caulobacter* major chemotaxis operon. *J Bacteriol* **182**:504–7.
6. **Hoang TT, Karkhoff-Schweizer RR, Kutchma AJ, Schweizer HP.** 1998. A broad-host-range Flp-FRT recombination system for site-specific excision of chromosomally-located DNA sequences: application for isolation of unmarked *Pseudomonas aeruginosa* mutants. *Gene* **212**:77–86.
7. **Newman JR, Fuqua C.** 1999. Broad-host-range expression vectors that carry the l-arabinose-inducible *Escherichia coli* araBAD promoter and the araC regulator. *Gene* **227**:197–203.
